# Supplementary material
Source: Springer Nature journal article supplement (https://www.springermedizin.de/resource/supplementary/12885_2007_784_MOESM1_ESM.pdf/9470326)
Supplement: MOESM1 [file 9470326]

## ER-, PR-, HER2- versus others

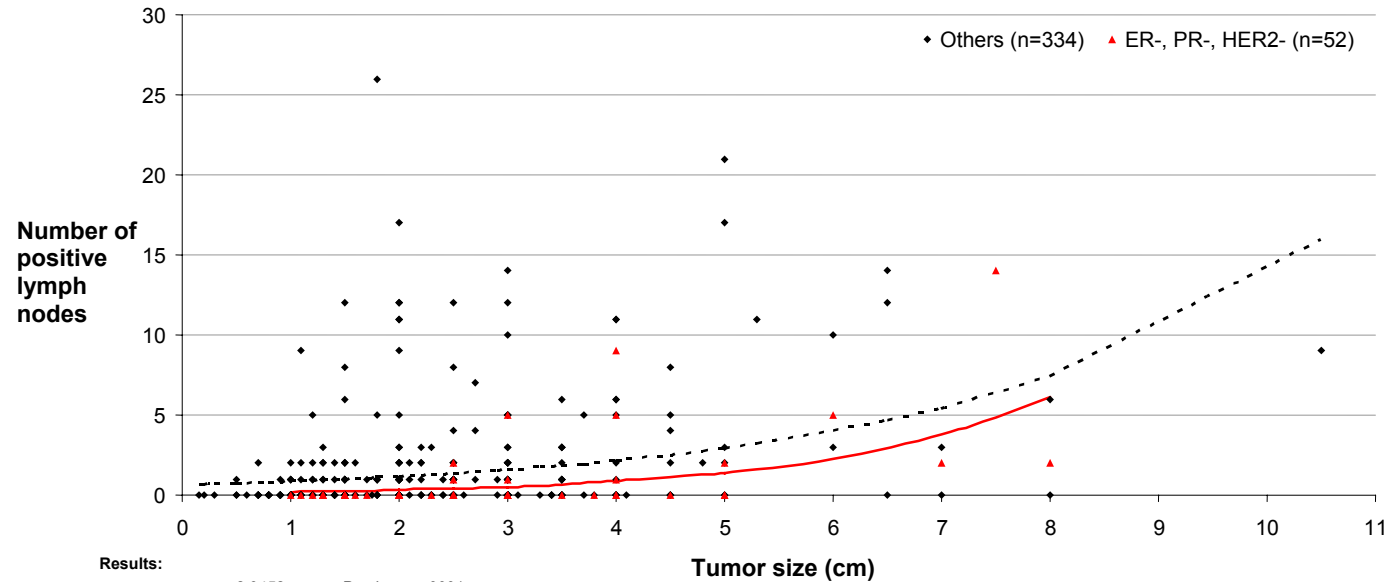

### Results:

|                                    |           |         |        |
|------------------------------------|-----------|---------|--------|
| $\alpha_{\text{overall}}$          | = -2.9452 | P-value | <.0001 |
| $\alpha_{\text{ER-,PR-,HER2-}}$    | = -1.6688 | P-value | =.0109 |
| $\beta_{\text{tumor size}}$        | = 0.3077  | P-value | <.0001 |
| $\beta_{\text{interaction slope}}$ | = 0.1857  | P-value | =.1085 |
| $\ln(\text{tot\_node})$            |           | Offset  |        |

Prediction is made at the overall median total node examined (i.e. 12).
